# Supplementary material for: High Glucose-Induced Cardiomyocyte Damage Involves Interplay between Endothelin ET-1/ETA/ETB Receptor and mTOR Pathway
Source: Int J Mol Sci. 2022 Nov 10;23(22):13816. doi: 10.3390/ijms232213816 (PMC9699386; doi:10.3390/ijms232213816)
Supplement: Supplementary file 1 [file ijms-23-13816-s001.zip › ijms-1998385-supplementary.pdf]

## Supplementary information

### Supplementary table

Table S1. List of primer sequences (rat)

| Name                 | Sequence (5' - 3')     |
|----------------------|------------------------|
| F-ET <sub>A</sub> -R | CGTCTTCTGCTTGGTTGTCA   |
| R-ET <sub>A</sub> -R | GCAACAGAGGCATGACTGAA   |
| F-ET <sub>B</sub> -R | CTGTGGGGATCACAGTGTTG   |
| R-ET <sub>B</sub> -R | TGCATGAAGGCTGTTTTCTG   |
| F-ET-1               | ACCACAGACCAAGGGAACAG   |
| R-ET-1               | GGTCTTGATGCTGTTGCTGA   |
| F-GAPDH              | AGACAGCCGCATCTTCTTGT   |
| R-GAPDH              | CTTGCCGTGGGTAGAGTCAT   |
| F-mTOR               | AGGGCAGCAACAGTGAAAG    |
| R-mTOR               | CGACAAGGAGATAGAACGGAAG |
| F-Raptor             | CTCTCAACTGCCAACCATC    |
| R-Raptor             | AAAATCGTCCCAGCAAGTC    |
| F-Rictor             | ACACCATCCTTCCTCACTC    |
| R-Rictor             | AGGTCCTCGTTTCTTCATTTC  |
| F-PGC1 $\alpha$      | ATGTGTCGCCTTCTTGCTCT   |
| R-PGC1               | CGAGAAAAGGATCTCGAACG   |
| F-TFAM               | GGAAGAGCAAATGGCTGAAG   |
| R-TFAM               | CCCAATCCCAATGACAATC    |

## Supplementary figures

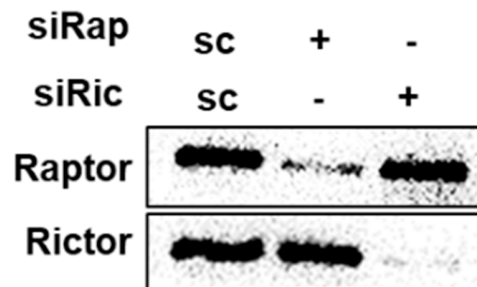

**Figure S1. Silencing efficiency of siRNAs targeting raptor (siRap) and rictor (siRic)**

The H9c2 cells were seeded in 10 cm culture dish in low glucose DMEM medium for overnight. Next, cells were transfected with siRNAs targeting either Raptor or Rictor (20 nM) or control siRNAs (sc) for 24 hours using Lipofectamine reagent. Thereafter, protein was harvested using lysis buffer described in methodology section. The western blotting was performed using primary antibodies specific for Raptor and Rictor.
